# Supplementary material for: Connection between the length of day and wind measurements in the mesosphere and lower thermosphere at mid and high latitudes
Source: Copernicus journal article supplement (doi:10.5194/angeo-2018-51), 2018-06-20
Supplement: Supplementary file [file angeo-2018-51-AC1-supplement.zip]

# Connection between the length of day and wind measurements in the mesosphere and lower thermosphere at mid and high latitudes.

Sven Wilhelm<sup>1</sup>, Gunter Stober<sup>1</sup>, Vivien Matthias<sup>2</sup>, Christoph Jacobi<sup>3</sup>, and Damian J. Murphy<sup>4</sup>

<sup>1</sup>Leibniz Institute of Atmospheric Physics at the University of Rostock, Kühlungsborn, Germany

<sup>2</sup>Potsdam Institute for Climate Impact Research, Potsdam, Germany

<sup>3</sup>Universität Leipzig, Institute for Meteorology, Germany

<sup>4</sup>Australian Antarctic Division, Kingston, Tasmania, Australia

**Correspondence:** S. Wilhelm (wilhelm@iap-kborn.de)

## Abstract.

This work presents a connection between the density variation within the mesosphere and lower thermosphere (MLT) and changes in the intensity of the solar radiation. On a seasonal time scale, these changes take place due to the revolution of the Earth around the Sun. While the Earth, during the northern hemispheric winter, is closer to the Sun, the upper mesosphere expands due to an increased radiation intensity, which results in changes in density at these heights. These density variations, i.e. a vertical redistribution of atmospheric mass, have an effect on the rotation rate of Earth's upper atmosphere owing to angular momentum conservation. In order to test this effect we applied a theoretical model, which shows a decrease of the atmospheric rotation speed of about  $\sim 4$  m/s in the case of a density change of 1% between 70 and 100 km. To support this statement, we compare the wind variability obtained from meteor radar (MR) and MLS satellite observations with fluctuations in the length of a day (LOD). Changes in the LOD on time scales of a year and less are primarily driven by tropospheric large scale geophysical processes and their impact on the Earth's rotation. A global increase of lower atmospheric eastward directed winds leads, due to friction with the Earth's surface, to an acceleration of the Earth's rotation by up to a few milliseconds per rotation. The LOD shows an increase during northern winter and decrease during summer, which corresponds to changes in the MLT density due to the Earth - Sun movement. Within the MLT the zonal mean wind show similar fluctuations as the LOD, on annual scales as well longer time series, which is connected to the seasonal wind regime as well as to density changes excited by variations in the solar radiation. Further, we show that, even after removing the seasonal and 11-year solar cycle variations, the zonal mean wind and the LOD are connected, by analyzing long term tendencies for the years 2005 - 2016.

## 1 Introduction

According to the first Kepler's law the Earth travels, in a good approximation, on an elliptic trajectory around the Sun. Within a year the distance between both celestial bodies changes. During the northern hemispheric (NH) winter the range is approximately 3.29% shorter than in the NH summer. Due to the inverse square law, where the intensity  $I$  of the radiation is inverse proportional to the Earth-Sun distance squared this shorter distance between the Sun and the Earth during boreal winter leads to an increased heating of the mesosphere and lower thermosphere (MLT) resulting in an expansion of the MLT and thermosphere, compared to the annual mean. Another effect on the expansion/shrinking of the MLT is given by the variability of solar radiation due to the 11-year solar cycle effect. Figure 1 shows a scheme of the Earth Sun constellation and the resulting effects, which will be explained in the following. Previous studies as, e.g., Walterscheid (1989), Marsh et al. (2007), Emmert (2015), and Lee et al. (2018) showed that solar cycle variations affects the atmospheric density, temperature, chemical composition and winds over the whole atmosphere, but in particular, in the MTI (Mesosphere-Thermosphere-Ionosphere) system. In a model simulation Marsh et al. (2007) showed, for the whole atmosphere, response to changes in the 11-year solar cycle, with e.g., the result of temperature changes in the lower thermosphere by over 100 K at solar maximum relative to solar minimum. Further they showed the occurrence of tropospheric wind and temperature changes due to changes in the solar radiation. But they also mention that changes in the climatology due to solar radiation are too complex to be explained by simplified methods. Stober et al. (2014) showed that a solar cycle effect between 2002 and 2013 led to changes in the neutral density within the MLT region by up to 2.5%. Furthermore, satellite measurements showed on global scales a neutral density decrease by up to  $\sim 30\%$  between solar maximum and solar minimum at about 400 km (Emmert et al., 2010). For the winter season 2009/2010 Stober et al. (2012) showed a connection between the neutral density and the expansion/shrinking of the atmosphere by using meteor radar (MR) winds, Lidar and Microwave Limb Sounder (MLS) satellite temperature measurements. Further, they show a strong anti-correlation of neutral air density and prevailing zonal winds. This indicates that an increase/decrease of the neutral density occurs almost simultaneously with a decrease/increase in zonal wind speed, respectively.

Changes in the thickness of the atmosphere, resulting from differences in the distance between Earth and Sun as well as from solar cycle effects, go along with changes of the Earth's rotation speed. Based on the conservation of angular momentum  $L$ , the angular velocity  $\omega$  for an altitude defined atmospheric layer  $a$ , with the thickness  $a_o - a_i$ , can be estimated by:

$$L = J\omega = \frac{2}{5} m \frac{a_o^5 - a_i^5}{a_o^3 - a_i^3} \omega, \quad (1)$$

where  $J$  is the moment of inertia for a spherical shell, which rotates about an axis through the center,  $a_{o,i}$  are the inner and outer radius of the spherical shell, and  $m$  is the atmospheric mass. On this occasion the atmospheric mass is calculated according Trenberth and Guillemot (1994) by

$$m = \int_{r_0}^{\infty} \int_0^{2\pi} \int_{-\pi/2}^{\pi/2} \rho r^2 \cos \phi \, d\phi \, d\lambda \, dr, \quad (2)$$

- 5 where  $\rho = \rho(\lambda, \phi, r)$  is the density of air at longitude  $\lambda$  and latitude  $\phi$ , and  $r$  is the distance from the Earth's center, while  $r = r_0$  at the surface of the Earth. In a good approximation the Earth's surface can be described as an ellipsoid  $r_0^2 = a^2(1 - 2\alpha \sin^2 \phi)$ , where  $a$  is the equatorial radius,  $\alpha = (a^2 - b^2)/2a^2$  is related to the flattening and  $b$  is the polar radius. With respect to the height above the surface  $z$ , this results in  $r^2 = (a + z)^2(1 - 2\alpha \sin^2 \phi)$  and  $dr = (1 - 2\alpha \sin^2 \phi)^{\frac{1}{2}} dz$ . Further, under the assumption that  $\rho = \rho_1(r)\rho_2(\lambda, \phi)$ , the atmospheric mass can be derived by

$$10 \quad m = \int_0^{2\pi} \int_{-\pi/2}^{\pi/2} \left[ \int_0^{\infty} \rho_1(z)(a + z)^2 dz \right] \rho_2(\lambda, \phi)(1 - 2\alpha \sin^2 \phi)^{\frac{3}{2}} \cos \phi \, d\phi \, d\lambda \quad (3)$$

The integral with respect to  $z$  and the relation to the measurements of the surface pressure  $p_s$  can be estimated by solving

$$p_s = \int_0^{\infty} \rho_1(z)g(z) \, dr, \quad (4)$$

- where  $g$  is the acceleration due to gravity. Considering that  $g$  is a function of height and latitude the total atmospheric mass can be written in numerical terms as  $m = 5.22371 \times 10^{15} \bar{p}_s$ , where  $m$  is given in kilograms, and  $\bar{p}_s$  is given in hectoPascal, for standard gravity at  $45^\circ$  latitude. More detailed information about the estimation of the total mass of the atmosphere can be found in Trenberth and Guillemot (1994). According to Trenberth and Smith (2004) the total mean mass of the atmosphere is  $5.148 \times 10^{18}$  kg and varies slightly on annual scales mainly due to the amount of available water vapor.

- A method to measure variations in the rotation speed of the solid Earth is estimating the time the Earth needs for a full rotation. In the following we define the crust, mantle and core of the Earth as solid Earth. To estimate the percentage of the atmospheric rotation velocity from the solid Earth rotation velocity, their rotation rate and their variations are necessary. The time the Earth needs for a full rotation is not constant. The rate of rotation and the orientation of the Earth's axis varies in time and space. Perturbations in the Earth's rotation rate are caused either by external forces, as e.g., the influence of celestial bodies, or by internal torques, which are, e.g., large scale geophysical processes (Brzezinski et al., 2001). These internal torques are a combination of relative movements and mass reallocation of Earth's core, mantle, crust, oceans tides, and the atmosphere.

Geographical differences in wind pattern and oceans cause shifts in the air and in the water masses. Earthquakes displacing the Earth's mantle might also influence the Earth's rotation on longer time scales (Carter and Robertson, 1986).

On time scales less than a year the dominant geophysical process to influence the duration of the Earth's rotation is the atmosphere (Volland, 1988). Every large scale momentum exchange of the Earth's atmosphere on the Earth's surface increases

5 or decreases their rotation, due to the law of conservation of total angular momentum within its system. The total angular momentum of the Earth's atmosphere  $M$  can be approximately written as

$$M = \int_v \rho_{apc} L_{apc} dV = \int_v \rho_{apc} r \times (u_{rel} + \omega \times r) dV, \quad (5)$$

where  $L_{apc}$  is the angular momentum of an air parcel of unit mass,  $\rho_{apc}$  the density of the air parcel,  $u_{rel}$  the relative velocity, and  $\omega \times r$  is the velocity due to the rotation of the Earth (Madden and Speth, 1995).

10 The total angular momentum and the velocities can be split into two parts. The mass part  $M_\omega$  represents the value the angular momentum would take if the atmosphere were vertically and horizontally stationary relative to the ground, and the relative part  $M_r$  describes the part of the atmosphere angular momentum that is due to the motion of the atmosphere relative to the Earth's rotation. Following Madden and Speth (1995), Egger et al. (2007), and Driscoll (2010) these parts of angular momentum can be written as

$$15 \quad M = M_\omega + M_r = \frac{r^4 \omega}{g} \int_0^{2\pi} \int_{-\pi/2}^{\pi/2} p_{sfc} \cos^3 \theta d\theta d\lambda + \frac{r^3}{g} \int_0^{1000} \int_0^{2\pi} \int_{-\pi/2}^{\pi/2} u_{rel} \cos^2 \theta d\theta d\lambda dp. \quad (6)$$

Thus, changes in the atmospheric angular momentum depend on the sum of different torques  $dM/dt = T_F + T_M + others$ . Here  $T_F$  is the friction torque,  $T_M$  is the mountain torque, and others torques include for example, the gravity wave torque, which is small compared to the other two mentioned. The friction torque is exerted on the Earth's surface mainly due to frictional forces between the wind and the surface. If eastward directed surface winds are prevailing on a global scale, this

20 torque leads to an increase of the rotation rate due to angular momentum transfer from the atmosphere to the Earth's surface. The mountain torque is based on the surface pressure and orography, and it is the torque which is exerted on the Earth's surface due to a difference of pressure on two sides of a mountain. Both torques vary according to their global location and reach values in the range of  $10^{19}$  Nm (Egger et al., 2007; Driscoll, 2010; de Viron and Dickey, 2014). The dominant exchange of the angular momentum between atmosphere and Earth takes place in the atmospheric boundary layer, which, depending on the

25 orography and latitude, has a typical thickness of about 1 km at mid-latitudes (Volland, 1988).

Already in the 1960s and 70s scientists showed that fluctuations in the orientation of the Earth's rotation axis, on seasonal time scales, are associated with changes in the east-west tropospheric wind on a global scale and therefore accompanied with a transfer of angular momentum between the Earth's crust and the atmosphere (Munk and MacDonald (1961), Lambeck (1978)).

Changes in the speed of the Earth's rotation axis can be seen in fluctuations in the duration of a day. These fluctuations have been measured since the 60s using the Very Long Baseline Interferometry (VLBI) technique. The fluctuations in the day length is the difference between the astronomical determined duration of a full day  $2\pi/D$  and the standard 86400 SI seconds, whereby  $D$  is the angular velocity (Aoki et al., 1981). Henceforth, we use the acronym LOD for the fluctuations in the length of day.

5 The LOD can be written as

$$LOD(t) = \frac{2\pi}{D} - 86400s. \quad (7)$$

Within the estimation of the LOD the sidereal time gets converted into solar time, by taking into account the Earth's position and motion with respect to the stars (Aoki et al., 1981).

Carter and Robertson (1986) studied the influence of geophysical processes of the atmosphere on the duration of a day. They showed that when the globally averaged mean winds from east to west increase, the rotation rate of the Earth decreases and the day gets longer. Rosen and Salstein (1991) showed that the effect of the wind on the LOD decreases with heights, by showing that winds in the atmospheric layer between 1000 and 10 hPa contributes 0.5 ms, from 10 to 1 hPa contributes 0.03 ms, and winds above 1 hPa contributes less than 4  $\mu s$  to the inter-annual LOD budget. The impact of large scale geophysical processes like, e.g., El Niño (e.g., Dickey et al., 1994) and the stratospheric quasi-biennial oscillation (QBO) can also be seen in the LOD (e.g., Volland (1988), Eubanks et al. (1988)).

On short time scales a change in the Earth rotation can lead to an uneven heating of the Earth's surface, which results to temperature differences between the surface and the atmosphere above. This can further cause convection currents, which leads to pressure differences in the atmosphere and results in a different wind formation, which can influence the day length. On longer time scale and especially on higher altitudes increases the importance of the solar influence. An increase of the solar radiation, which can be caused due to a slowing of the Earth's rotation, leads to an expansion of the higher atmosphere, which further results, due to the conservation of angular momentum, in a slower rotation of the atmosphere. What further needs to be considered is e.g., the influence of volcanic eruptions, which influence the Earth's rotation as well as the atmospheric chemistry/temperature (e.g., She et al., 2015). Changes in these parameters can further lead to changes in the neutral density.

25 Within this study we focus on heights between 60 and 100 km. These heights are sensitive enough to density changes due to the changes in the intensity of the solar radiation. After we describe the data we used in this study in Section 2, we show results and discuss the theoretical change of the rotation speed due to an expanding/shrinking atmosphere in Section 3. We will show that due to the expansion/shrinking effect even under the assumption of equal density distribution between the northern and southern hemisphere (SH), differences in the prevailing wind occur. Furthermore, we will show a connection between the LOD and the prevailing wind by showing correlations in the MLT region by using MR and MLS data for one polar and two mid latitude locations. We use the LOD data to show, how deep the influence of the solar radiation penetrates into the atmosphere. The conclusions are found in Section 4.

## 2 Data

The wind data we use in this study are derived from MR and MLS satellite measurements. The MRs are located at the northern high latitude station Andenes (32.5 MHz, 69.3°N, 16.0°E, Norway), the mid-latitude stations Juliusruh (32.5 MHz, 54.6°N, 13.4°E, Germany), and Collm (36.2 MHz, 51.3°N, 13.0°E, Germany) on the northern hemisphere and the southern high latitude station Davis (33.2 MHz, 68.6°S, 78.0°E, Antarctic). The radars cover an altitude range between 75 and 110 km and the obtained winds have an hourly temporal resolution, and a vertical altitude resolution of 2 km in the applied analysis. At 90 km altitude the observed volume of each radar has a diameter of approximately  $\sim 400$  km, and the mean wind above each station is a weighted average over this volume. In the case of the Andenes, Davis and Collm MR data are available between 2005 and 2016 and for Juliusruh since 2008. We focus on an altitude range between 78 and 100 km where we obtain continuous measurements. The statistical uncertainties of winds are obtained from a fitting procedure by taking into account the number of detected meteors per altitude and time bin, as well as a full non-linear error propagation of the radial wind errors. Therefore the resulting uncertainties for the hourly winds vary in a range between 2 and 6 m/s with larger errors at the edges of the meteor observations. More information about the all-sky meteor radars and the used wind estimation method can be found in Hocking et al. (2001), Holdsworth et al. (2004) and Stober et al. (2017). For this research, we focus primarily on the zonal wind component, because a connection between winds and changes in day length will be mainly seen in the main rotation direction of the Earth.

In addition to local radar observations, we use satellite data from the Microwave Limb Sounder (MLS) to extend the vertical coverage. MLS onboard the Aura satellite (Waters et al. (2006), Livesey et al. (2015)) has a global coverage from 82°N to 82°S and an useful height range from approximately 11 to 90 km (261 to 0.001 hPa). The vertical resolution varies between  $\sim 4$  km in the stratosphere and  $\sim 14$  km at the mesopause (Livesey et al., 2007). The geometric heights are approximately estimated from pressure levels as described in Matthias et al. (2013):  $h = -7 \cdot \ln(p/1000)$ , where  $h$  is the altitude in km and  $p$  the pressure in hPa. Furthermore, we are aware about a difference between the geometric and geopotential heights, which increase especially above 80 km. Therefore, we focus in this work on the height range between 60 to 80 km (if not otherwise specified) to investigate a connection between the LOD and the density depending zonal wind within these heights. Daily quasi geostrophic winds for the years between 2005 and 2016 are derived from MLS geopotential height observations. For this study we use three different horizontal grids which are located around Andenes (70°N and 0-20°E) and around Juliusruh/Collm (50-60°N, 0-20°E), which are further referred to as northern high and mid latitude station, respectively. For the SH we use a horizontal grid around Davis(70°S, 60-80°E).

Further we use in this study combined data from the international Earth Rotation and Reference System Service (IERS). The use of interferometry between several stations, which observe radio sources, leads to fundamental geodetic information as changes in the Earth's spinning or in the Earth orientation (Rothacher (2002), Altamimi et al. (2007), Boeckmann (2010)). Based on these information the mean rotation rate and the astronomical duration of the day were computed according to equation 6 (Aoki et al., 1981). The IERS provides uncertainties for the day length measurements which most of the time vary

in a range of  $\sim 5\%$ . More information about the data provided by IERS and their algorithm to estimate the duration of a day can be found in Bizouard et al. (2017).

### 3 Results and Discussion

#### 3.1 LOD and neutral air density at the MLT

Figure 2 shows composites of zonal winds from MR measurements at Andenes, Juliusruh, Collm, and Davis. These data are estimated by using a mean wind adaptive spectral filter (Stober et al., 2017). It uses a 1 day sliding window, which mainly removes the impact of short-term variations, as atmospheric tides and gravity waves. All three NH stations show almost similar wind patterns, with typical mesospheric eastward directed winds during the winter, with mean values of up to 10 m/s, and a wind reversal during spring. The spring wind reversal occurs earlier at mid latitudes than at polar latitudes. During the summer considerable vertical wind shear is present with westward directed winds below 90 km for Andenes, below 88 km for Juliusruh, and below 85 km for Collm. Above these heights a strong eastward jet occurs. The westward and the eastward jets reach wind values of up to 40 m/s at all three locations. These annual wind climatologies are consistent with previous studies e.g., Manson et al. (2004), Hoffmann et al. (2010), and Jacobi (2012). Compared to Andenes a nearly opposite wind pattern can be seen for Davis. A dominant eastward directed wind occurs between March and September for the complete observation range. Between September and March occurs a vertical wind shear, which reaches around October heights above 100 km. Compared to the NH stations the summer vertical wind shear remains more below 90 km.

Besides the radar data we additionally use MLS data within this study to extend the vertical coverage down to 60 km. In Figure 3 the zonal wind is shown for the high latitude location of Andenes, for middle latitudes at Collm and for the southern latitude location Davis. The altitude ranges between  $\sim 60$  and  $\sim 90$  km geopotential height. A comparison of the MLS composite winds with MR composite winds results in a qualitatively good agreement for the seasonal amplitudes and phases. Both NH locations show eastward directed winds between September and April for nearly all altitudes, with values of up to 40 m/s for the high latitude area and up to 60 m/s for the midlatitudes. During summer westward directed wind dominates below 95 km and reaches values of up to 30 m/s for the high latitudes. For the middle latitude, below 90 km, the wind reaches values of up to 50 m/s. A similar pattern of an eastward directed wind occurs in both cases during summer above 90 km geometric height. The SH location also shows similar wind pattern as the observed MR data. In the following discussion we will focus on the MLS altitude range 60-80 km and use the MR data for the altitudes between 80 and 100 km.

According to previous studies as e.g., by Emmert et al. (2004) and Stober et al. (2012), a connection exists between the thickness of an atmospheric layer and the density fluctuation within that layer. Stober et al. (2012) explained the occurrence of this connection by showing variations in the neutral density, based on MLS and MR observations, together with changes in the MLT geometric height. Furthermore they showed a strong anti-correlation between the simultaneous occurrence of the zonal wind and the density change within the mesosphere. To underline this statement, Figure 4 shows, for the location of Andenes, the zonal mean wind between 84 and 94 km together with the F10.7 solar radio index (black line). An enhancement of the eastward directed wind occurs together with a stronger F10.7 index and more clearly an increase of the westward directed wind

together with a smaller F10.7. Furthermore a shift occurs in the summer vertical wind shear, which is also correlated with the solar cycle, whereby a shift to higher altitudes takes place together with a decrease of the solar radiation, due to a change in the neutral density. In the following part we investigate a potential connection between the expanding MLT and the atmospheric rotation speed. Figure 5 shows, as an example, the theoretical variation in the atmospheric rotation velocity with height due to a density increase up to 1% between 70 and 100 km. The calculation is done in 2 km height layers. The density increase takes place for longer time scales during a solar maximum (e.g., Emmert et al., 2010) and on annual time scales during the winter, when the Earth-Sun distance is smaller. Both cases influence the temperature within this atmospheric layer as well as their expansion compared to the annual mean. Overall the density variation during an 11-year solar cycle are stronger than the variation caused by the changes of the Earth-Sun distance. According to equations 1 - 4, we estimated for three different cases (linear (red), exponential (green) and a Gaussian shape (blue) density increase) the resulting theoretical change in the rotation speed within these heights, with the solid Earth rotation speed (black) as background flow. Based on the conserved quantity of the angular momentum within a narrow atmospheric layer (2 km vertical) this sums up, according to each case, to a decrease of the rotation speed by up to  $\sim 2\text{--}4$  m/s, with the strongest variation within the Gaussian shaped curve. These results fit to the observations by Stober et al. (2012) and show the dependence of the rotation speed within an atmospheric layer due to changes in the neutral density. However, only based on wind measurements we are not able to extract a specific wind value.

Based on ERA40 data, Trenberth and Smith (2004) showed that the global mean of the surface pressure is nearly constant, and surface pressure anomalies at the northern and the southern hemispheres are nearly identical, but the fluctuations are opposite in sign. These anomalies are mainly due to the changing amount of available water vapor in the atmosphere. Under the assumption of opposite surface pressure anomalies within both hemispheres and therefore by neglecting other factors as e.g., different gravity wave forcing between the hemispheres, we assume, on annual scales, similar pressure values within the MLT region. Therefore the prevailing wind within the MLT region should be similar in magnitude between Andenes and Davis, which are located at the same latitude in the northern and southern hemispheres. To underline the influence of the intensity of the solar radiation on the density and also on the amplitude of the zonal wind, we compare the temporal development of the seasonal mean wind measurements from the NH station Andenes ( $69.3^\circ\text{N}$ ) and SH station Davis ( $68.3^\circ\text{S}$ ). Figure 6 shows, for both stations, the winter and summer mean wind for the altitudes at 88 and 96 km. The northern winter includes the mean of the months December, January and February, and the southern winter the months June, July and August. The northern winter period comes along with the perihelion, which is the point where the Earth comes nearest to the Sun. At the perihelion the intensity of the solar radiation on the upper atmosphere is higher as during the aphelion. While during the winter season the wind values are higher over Davis for both altitudes, they are higher over Andenes during the summer season, especially at 96 km, with values of up to 10 - 20 m/s. Both seasonal wind differences are consistent with the change in the average density within the upper mesosphere, resulting from the different distance between Earth and Sun and leading to the variation of the averaged zonal wind, as shown in Stober et al. (2012). We have to note that beside many other factors, this is only one reason, and by far not the dominant factor, for the wind differences between both locations at these altitudes. Other physical processes have also a strong effect on the hemispheric wind differences e.g., the topography, chemical composition of the atmosphere (Marsh et al. (2007), Lee et al. (2018)), and the occurrence and propagation of gravity waves. These waves are the main drivers



of the atmospheric wind circulation and therefore also influence the local wind differences at both hemispheres. Furthermore, gravity waves lead, compared to the annual mean, to a colder summer mesosphere and a warmer winter mesosphere (e.g., Lübken et al., 2014). These temperature differences also fit well to the atmospheric expansion/shrinking. Unfortunately, based only on wind measurements we are not able to estimate a precise value on how strong the connection is between zonal mean  
5 wind with the LOD. For a more detailed understanding of these phenomena global density observations would be required.

### 3.2 Correlation of mean winds and LOD

In the following we want to show that the LOD (fluctuations in the length of a day) correlates with the prevailing wind from the four stations. If the Earth's rotation is constant the LOD should be zero, however, small wobbles of the Earth's rotation between  
10 the days cause tiny fluctuations in the day length. These have to be compensated by a momentum transfer between the different parts of the Earth including the atmosphere. As the atmosphere is slaved to the Earth crust, because the atmospheric momentum and mass are much smaller than of the Earth core, the atmosphere has to respond to changes in the rotation velocity and at least the troposphere can trigger an own feedback on the LOD. So far we use the LOD explicitly as reference for the changes in the rotation speed, which can be seen in the zonal wind, as well as to verify up to which height the solar driven density effect is  
15 dominant. Therefore the next two Figures 7 and 8 show wind values for Andenes, Collm, and Davis at different altitudes and the LOD by using the same filtering method as done for the winds. Two different altitudes in the MLT are considered from the MR winds for all locations: (1) 80 km, where within a year a change between eastward and westward directed wind occurs, and (2) 96 km, the altitude where the wind, during each hemispheric summer shows the opposite direction as at 80 km (see Figure 2). Positive wind values correspond to eastward directed winds and positive LOD values correspond to a longer duration of  
20 the day. If not explicit mentioned, the results of the two mid-latitude stations are nearly identical. Therefore we only show the results for the location around Collm.

At 80 km (Figure 7) the oscillation pattern of the smoothed zonal wind (blue) and the smoothed LOD (black) are similar for Andenes. According to previous studies the LOD consists of superpositions of several periods, as 0.5 years, 1 year (see also Vondrák and Burša, 1977), 2-3 years (Buffet, 1996), 5.9 years (Abraca del Rio et al., 1999) and others (e.g., Munk and  
25 MacDonald (1961), Holme and de Viron (2013)). According to Abarca-del Rio et al. (2003) an accurate estimation of the impact of the solar radiation is quite complicated, due to the fact that internal oscillations in the climate system show variations with the same frequency as the 11 year solar cycle. Further, Gray et al. (2010) support this statement and mention that the problem is further complicated due to the small influence of the solar forcing on the climate. Nevertheless, Chapanov and Gambis (2008) showed that based on a decomposition of the LOD, the solar activity (10.47 years) is included. Also the zonal  
30 wind includes a superposition of several periods as the solar cycle, diurnal, and semidiurnal tides and more (e.g., Emmert et al. (2010), Hoffmann et al. (2010)). Therefore, we additionally show with the red line a smoothed zonal wind after removing variations due to the 11-year solar cycle. The influence of the solar cycle on the daily zonal wind is relatively small, therefore the smoothness of the red line is enhanced for better visualization. Changes in the LOD are sluggish compared to variations in the wind, due to the amount of momentum which is needed to influence the Earth's rotation speed. According to e.g., Dickey

et al. (1994), a direct effect between the stratospheric and tropospheric zonal wind and the day length exists, on annual time scales due to long term geophysical effects, as e.g., QBO and El Niño. They found that the stratosphere cannot be neglected in the Earth's angular momentum. Around 20% of the LOD relative to the atmosphere below 100 hPa, belongs to the impact of the stratosphere. Furthermore, they mentioned a small lag (10 - 20 days) between the LOD and variations in the angular momentum, but the lag does not appear to be statistically significant. Therefore only comparisons on seasonal and longer time scales are useful to be considered. All parameters which are displayed in Figure 7 show a seasonal pattern. First we describe the results for the NH stations. For the NH the zonal wind and the LOD shows decreasing values during summer and increasing values during winter. Beside the striking seasonality, short time fluctuations within a year are observable during the winter in the zonal wind for some years. During the winter of 2010 and 2011, and on even shorter time scales as few months during the winter 2006, 2014 and 2015, decreases in the LOD together with decreases in the zonal wind are visible. The LOD varies between -1 and 4 milliseconds. The LOD oscillation shows seasonal variations of a fluctuation with shorter day lengths during NH summer and longer day lengths during winter, which fits to the density increase and decrease of the MLT as described above. For the midlatitude station the oscillation pattern in the LOD and the wind are qualitatively similar, but shifted in time. The wind peaks occur earlier in the year than the LOD peaks, which goes along with the earlier wind transition at midlatitudes, which can be seen in Figure 2. For Davis a time shift of approximately half a year occurs between the zonal wind and the LOD, due to the opposite seasonal wind pattern.

In the summer wind transition altitude a time shift occurs between both parameters. The altitude of the wind transition in these cases is defined as the height between the above located eastward and the below located westward wind during summer. At these heights the wind and the LOD are almost uncorrelated. Above the summer wind transition altitude the oscillation pattern between the LOD and the winds are quite the opposite than for 80 km altitude, with a 180° shift between both parameters, which can be seen in Figure 8. The phase shift, which is pronounced during the summer, obviously results from the opposite wind regime compared to the 80 km altitude. Nevertheless, above the transition height, changes in the density, due to the intensity of the solar radiation, are more pronounced than at lower heights. Therefore the existing seasonal wind pattern fits well to the atmospheric density increase and decrease at these layers.

Additionally, we show in Table 1 correlation coefficients for the 4 locations for the altitudes between 80 and 98 km. Positive correlation values correspond to the occurrence of an eastward directed wind together with an increased LOD. The values of the NH follow a similar pattern, with positive coefficients below the vertical transition height and negative above. Davis shows a different pattern, with overall negative correlation coefficients. This is owing to the opposite zonal wind pattern compared to the NH. Theoretical, a time shift of  $\sim$  half a year would lead to a similar correlation pattern as in the NH.

Figure 9 shows, the mean zonal wind at  $\sim$ 80 km geometric height, based on MLS data, and the LOD. These mean zonal winds include wind values within the longitude grid between 0°E and 20°E, which is comparable to the NH stations. The Figure is divided in 10° latitude steps centered at latitudes from 80° to 10°S/N. Each latitude grid includes values for  $\pm$  6°. For the MLS observations the comparison between the wind and the LOD are similar to the 80 km meteor results at the respective latitudes. Furthermore, the occurrence of half a year time shift between both high hemispheres can be seen. A 180° phase shift would lead to the wind-LOD pattern of the opposite hemisphere. Furthermore, the strongest correlation between both parameters can

be seen at northern polar latitudes. Due to an increase in the difference between the geometric and geopotential heights, we do not show comparisons for higher altitudes. Further, we added correlation coefficients between the zonal mean wind and the LOD for each latitude. A correlation increase towards the northern high latitudes is visible. The same would be seen if a  $180^\circ$  phase shift is added to the time series.

5 In the Figures 10 and 11 are shown long term changes of annual LOD (black) and annual zonal mean winds (red) for Collm and for Davis. At this point, we have to mention that the tendency over a long time series is not linear in time. Parameter which influence the tendency of the wind and the LOD also vary over time. Such changes are often be approximated by a piecewise linear trend model (e.g., Tomé and Miranda (2004), Merzlyakov et al. (2009) and Jacobi et al. (2011)), where different linear fit tendencies are estimated for different time periods. Nevertheless, due to the length of the available data series we decided  
10 not to use a piecewise linear trend model. The wind values exclude seasonal and solar cycle variations and the LOD excludes the seasonal variations. Exemplary for the locations of Collm (Figure 10) the altitudes between 80 and 96 km are displayed. The error bars correspond to the annual variance for each height and the dotted lines show the long term tendency for each parameter. Figure 10 shows that a long term increase of the LOD occurs together with a long term decrease of the zonal wind. Above 94 km the tendency reverses into a slightly positive wind. This reversal can be explain by the stronger influence due to  
15 gravity wave filtering, which has to be considered and cannot be excluded by filtering the data. The tendencies of an increased value for the LOD and a decreased value for the zonal mean wind can be seen for all mid latitude locations, and also for Davis (see Figure 11). Andenes shows for all altitudes increase tendency in the zonal wind (not shown). The results indicate that the connection between the LOD and the wind are more pronounced at lower latitudes, which is simply explainable by the rotation velocity, which is higher at the middle latitude stations than at the polar latitudes like at Andenes and Davis. The results of an  
20 increase of the LOD and a decrease of zonal wind fits to the relation between fluctuations in the neutral density and the zonal wind, as shown in Stober et al. (2012).

## 4 Conclusion

Within this work we show that the mesospheric winds are affected by an expansion/shrinking of the upper atmosphere that takes place due to changes in the intensity of the solar radiation, which effects the density within the atmosphere. A reason,  
25 besides the solar cycle effect, is the annual movement of the Earth around the Sun, which leads to a smaller distance between both celestial bodies during the NH winter, and a longer distance during summer. This leads to a shrinking/expansion of the atmosphere during the NH summer/winter. This shrinking effect takes mainly place in the upper atmosphere, where the amount of mass is small enough to be sensitive to changes to the intensity of solar radiation, as well as temperature changes. According to Stober et al. (2012) an increase of the neutral density together with a decrease of the zonal wind in the MLT region occurs.  
30 Based on these findings we showed that a theoretical density increase by 1% between 70 and 100 km leads to a decrease in the atmospheric rotation speed, within a defined layer, by up to 4 m/s. The influence of the Earth-Sun distance on the wind speed was further investigated using winds from four stations in total, whereby two stations are located at similar high latitudes for the northern and southern hemispheres. The other two locations are located at the northern midlatitudes. Based on summer and

winter mean wind, we found that during the perihelion, where the MLT expands, a decrease in the zonal wind speed for the respective location occurs together with an increase in the LOD. During the opposite aphelion, an increase in the zonal wind occurs beside a decrease in the day length.

Further, we showed that even after removing the seasonal and the 11 year solar cycle variations the zonal wind and the LOD (fluctuations in the length of a day) are connected. We showed the annual tendency development over the whole time period, with the result of an increasing LOD trend together with and more pronounced westward directed wind tendency for the middle latitude stations. This effect weakens at the polar station, which is on the one hand due to a smaller radius, which effects the rotation speed of the atmospheric layer. On the other hand, there are further natural factors, as e.g., the gravity wave drag, who strongly influence these tendencies. Further, we were only able to investigate the connection between theses parameters on time scales which are at least one year. On shorter time scales a connection between the LOD and the winds can not be figured out, the LOD consists of oscillations with at least half a year period and with the current available data we are not able to fully resolve the superpositions of both parameters. Future work remains necessary to fully understand these effects when global density data measurements are available. Additional, in future work the estimation of a time lag between the LOD and the winds needs to be considered.

We want to mention that based on our findings a connection between the zonal wind and the LOD exists, which we explain by the variation of the available atmospheric density. Further on the one side we only compare on the one side global LOD data with local measurements, and on the other side there are way stronger geophysical effects which drives the wind regime at these altitudes. Within this work we only want to point on this effect, and for closer investigations we need global longtime density data.

#### *Data availability.*

The Andenes/Juliusruh radar data are available upon request from Gunter Stober (stober@iap-kborn.de).

The Collm radar data are available upon request from Christoph Jacobi (jacobi@rz.uni-leipzig.de)

The Davis radar data are available upon request from Damian Murphy (Damian.Murphy@aad.gov.au)

#### *Authors contributions.*

Sven Wilhelm wrote the manuscript with input from all authors. Gunter Stober provided thigh resolution meteor wind data for all stations and ensured the operation of the Andenes and Juliusruh meteor radar. Christoph Jacobi ensured the operation of the Collm meteor radar and Damian Murphy the Davis meteor radar. Vivien Matthias provided the used mircowave limb sounder data. Furthermore contributed all co-authors with the data interpretation.

#### *Competing interests.*

The authors declare that they have no conflict of interest. C. Jacobi is one of the Editors-in-Chief of Annales Geophysicae.

*Acknowledgements.* This work was supported by the WATILA Project (SAW-2015-IAP-1 383). The Operation of the Davis Meteor radar was supported through Australian Antarctic Science projects 2668 and 4025. We thank IERS for providing the used LOD data, which can be found under <https://datacenter.iers.org>. Furthermore we acknowledge the IAP technicians for the technical support and Jorge L. Chau for discussion at an early stage of the work.

## References

- Abarca-del Rio, R., Gambis, D., Salstein, D., Nelson, P., and Dai, A.: Solar activity and earth rotation variability, *Journal of geodynamics*, 36, 423–443, [https://doi.org/doi:10.1016/S0264-3707\(03\)00060-7](https://doi.org/doi:10.1016/S0264-3707(03)00060-7), 2003.
- Abraca del Rio, R., Gambis, D., and Salstein, D.: Interannual signal in length of day and atmospheric angular momentum, *Annales Geophysicae*, 18, 347–364, <https://doi.org/10.1007/s00585-000-0347-9>, 1999.
- Altamimi, Z., Collilieux, X., Legrand, J., Garayt, B., and Boucher, C.: ITRF2005: A new release of the International Terrestrial Reference Frame based on time series of station positions and Earth Orientation Parameters, *Journal of geophysical research*, 2007.
- Aoki, S., Guinot, B., Kaplan, G., Kinoshita, H., McCarthy, D., and Seidelmann, P.: The new Definition of Universal Time, *Astronomy and Astrophysics*, 105, 359–361, 1981.
- 10 Bizouard, C., Lambert, S., Becker, O., and Richard, J.: Combined solution C04 for Earth Rotation Parameter consistent with International Terrestrial Reference Frame 2014, <https://hpiers.obspm.fr/iers/eop/eopc04/C04.guide.pdf>, 2017.
- Boeckmann, S.: Robust determination of station positions and Earth orientation parameters by VLBI intra-technique combination, Ph.D. thesis, Friedrich-Wilhelms-University, [http://hss.ulb.uni-bonn.de/diss\\_online](http://hss.ulb.uni-bonn.de/diss_online), 2010.
- Brzezinski, A., Bizouard, C., and Petrov, S.: Influence of the atmosphere on earth rotation: what we can be learned from the recent atmospheric angular momentum estimates?, *Surveys in Geophysics*, 23, <https://doi.org/doi:10.1023/A:1014847319391>, 2001.
- 15 Buffet, B. A.: Gravitational oscillations in the length of day, *Geophys. Res. Lett.*, 23, 2279–2282, 1996.
- Carter, W., E. and Robertson, D., S.: Studying the Earth by Very-Long-Baseline Interferometry, *Scientific American*, 255, 46–54, 1986.
- Chapanov, Y. and Gambis, D.: Correlation between the solar activity cycle and the Earth rotation, [https://syrtel.obspm.fr/jsr/journees2007/pdf/s4\\_18\\_Chapanov.pdf](https://syrtel.obspm.fr/jsr/journees2007/pdf/s4_18_Chapanov.pdf), 2008.
- 20 de Viron, O. and Dickey, J., O.: The two types of El Nino and their impacts on the length of day, *Geophys. Res. Lett.*, 41, <https://doi.org/doi:10.1002/2014GL059948>, 2014.
- Dickey, J., O., Marcus, S., L., Hide, R., Eubanks, T., M., and Boggs, D., H.: Angular momentum exchange among the solid Earth, atmosphere, and oceans: A case study of the 1982 - 1983 El Nino event., *Journal of geophysical research*, 99, 23, 921– 23,937, 1994.
- Driscoll, S.: The Earth’s Atmospheric Angular Momentum budget and its representation in reanalysis observation data and climate models, Ph.D. thesis, University of Reading, 2010.
- 25 Egger, J., Weickmann, K., and Hoinka, K.-P.: Angular momentum in the global atmospheric circulation, *Reviews of Geophysics*, 45, n/a–n/a, <https://doi.org/10.1029/2006RG000213>, <http://dx.doi.org/10.1029/2006RG000213>, rG4007, 2007.
- Emmert, J. T.: Altitude and solar activity dependence of 1967-2005 thermospheric density trends derived from orbital drag, *Journal of geophysical research: space physics*, 120, 2940–2950, <https://doi.org/doi:10.1002/2015JA021047>, 2015.
- 30 Emmert, J. T., Lean, J. L., and Picone, J. M.: Record-low thermospheric density during the 2008 solar minimum, *Geophysical Research Letters*, 37, n/a–n/a, <https://doi.org/10.1029/2010GL043671>, <http://dx.doi.org/10.1029/2010GL043671>, 112102, 2010.
- Emmert, J., T., Picone, J., M., Lean, J., L., and Knowles, S., H.: Global change in the thermosphere: Compelling evidence of a secular decrease in density, *Journal of geophysical research*, 109, <https://doi.org/doi:10.1029/2003JA010176>, 2004.
- Eubanks, T., Steppe, J., and Dickey, J.: The Earth’s Rotation and Reference Frame for Geodesy and Geodynamics, chap. The atmospheric excitation of rapid polar motions., Springer, 1988.
- 35

- Gray, L. J., Beer, J., Geller, M., Haigh, J. D., Lockwood, M., Matthes, K., Cubasch, U., Fleitmann, D., Harrison, G., Hood, L., Luterbacher, J., Meehl, G. A., Shindell, D., van Geel, B., and White, W.: Solar influence on climate, *Reviews of Geophysics*, 48, <https://doi.org/10.1029/2009RG000282>, <http://dx.doi.org/10.1029/2009RG000282>, 2010.
- Hocking, W. K., Fuller, B., and Vandepeer, B.: Realtime determination of meteor-related parameters utilizing modern digital technology, *Journal of Atmospheric and Solar-Terrestrial Physics*, 69(2-3), 155–169, [https://doi.org/10.1016/S1364-6826\(00\)00138-3](https://doi.org/10.1016/S1364-6826(00)00138-3), 2001.
- Hoffmann, P., Becker, E., Singer, W., and Placke, M.: Seasonal variation of mesospheric waves at northern middle and high latitudes, *Journal of Atmospheric and Solar-Terrestrial Physics*, 72, 1068–1079, <https://doi.org/10.1016/j.jastp.2010.07.002>, <http://dx.doi.org/10.1016/j.jastp.2010.07.002>, 2010.
- Holdsworth, D. A., Tsutsumi, M., Reid, I. M., Nakamura, T., and Tsuda, T.: Interferometric meteor radar phase calibration using meteor echoes, *Radio Science*, 39, <https://doi.org/10.1029/2003RS003026>, 2004.
- Holme, R. and de Viron, O.: Characterization and implications of intradecadal variations in length of day, *Nature*, 499, <https://doi.org/doi:10.1038/nature12282>, 2013.
- IERS: Earth orientation data, [https://datacenter.iers.org/eop/-/somos/5Rgv/eop? - EOP 14 C04 \(IAU2000A\) - one file \(1962-now\), download 04.04.2017](https://datacenter.iers.org/eop/-/somos/5Rgv/eop? - EOP 14 C04 (IAU2000A) - one file (1962-now), download 04.04.2017).
- Jacobi, C.: 6 year mean prevailing winds and tides measured by VHF meteor radar over Collm (51.3°N, 13.0°E), *Journal of Atmospheric and Solar-Terrestrial Physics*, 78-79, 8 – 18, <https://doi.org/https://doi.org/10.1016/j.jastp.2011.04.010>, <http://www.sciencedirect.com/science/article/pii/S1364682611001210>, structure and Dynamics of Mesosphere and Lower Thermosphere, 2012.
- Jacobi, C., Hoffmann, P., Liu, R., Q., Merzlyakov, E., G., Portnyagin, Yu., I., Manson, A., H., and Meek, C., E.: Long-term trends, their changes, and interannual variability of Northern Hemisphere midlatitude MLT winds, *Journal of Atmospheric and Solar-Terrestrial Physics*, 75-76, 81–91, <https://doi.org/doi:10.1016/j.jastp.2011.03.016>, 2011.
- Lambeck, K.: Progress in geophysical aspects of the rotation of the Earth, in: Ninth Geodesy and Solid Earth and Ocean Physics Research Conference, pp. 1–11, 1978.
- Lee, J., N., Wu, D., L. R. A., and Fontenla, J.: Solar cycle variations in mesospheric carbon monoxide, *Journal of atmospheric and solar-terrestrial physics*, 170, 21–34, <https://doi.org/https://doi.org/10.1016/j.jastp.2018.02.001>, 2018.
- Livesey, N., J., Read, W., G., Lambert, A., Cofield, R., E., Cuddy, D., T., Froidevaux, L., Fuller, R., A., Jarnot, R., F., Jiang, J., H., Jiang, Y., B., Knosp, B., W., Kovalenko, L., J., Pickett, H., M., Pumphrey, H., C., Santee, M., L., Schwartz, M., J., Stek, P., C., Wagner, P., A., Waters, J., W., and Wu, D., L.: EOS MLS Version 2.2 Level 2 Data Quality and Description Document., Technical Report Version 2.2 D-33509, Jet Propulsion Lab., California Institute of Technology, Pasadena, California 91198-8099., 2007.
- Livesey, N., Santee, M. L., and Manney, G.: A Match-based approach to the estimation of polar stratospheric ozone loss using Aura Microwave Limb Sounder observations, *Atmospheric Chemistry and Physics*, 15, 9945–9963, <https://doi.org/10.5194/acp-15-9945-2015>, [www.atmos-chem-phys.net/15/9945/2015](http://www.atmos-chem-phys.net/15/9945/2015), 2015.
- Lübken, F.-J., Höffner, J., Kaifler, B., and Morris, R., J.: Winter/summer mesopause temperature transition at Davis (69°S) in 2011/2012, *Geophys. Res. Lett.*, 41, 5233–5238, <https://doi.org/10.1002/2014GL060777>, 2014.
- Madden, R., A. and Speth, P.: Estimates of atmospheric angular momentum, friction, and mountain torques during 1987-1988, *Journal of the atmospheric sciences*, 52, 1995.
- Manson, A. H., Meek, C. E., Hall, C. M., Nozawa, S., Mitchell, N. J., Pancheva, D., Singer, W., and Hoffmann, P.: Mesopause dynamics from the scandinavian triangle of radars within the PSMOS-DATAR Project, *Annales Geophysicae*, 22, 367–386, <https://doi.org/10.5194/angeo-22-367-2004>, <http://www.ann-geophys.net/22/367/2004/>, 2004.

- Marsh, D., R., Garcia, R., R., Kinnison, D., E., Boville, B., A., Sassi, F., Solomon, S., C., and Matthes, K.: Modeling the whole atmosphere response to solar cycle changes in radiative and geomagnetic forcing, *Journal of geophysical research*, 112, <https://doi.org/doi:10.1029/2006JD008306>, 2007.
- Matthias, V., Hoffmann, P., Manson, A., Meek, C., Stober, G., Brown, P., and Rapp, M.: The impact of planetary waves on the latitudinal displacement of sudden stratospheric warmings, *Annales Geophysicae*, 31, 1397–1415, <https://doi.org/doi:10.5194/angeo-31-1397-2013>, [www.ann-geophys.net/31/1397/2013/](http://www.ann-geophys.net/31/1397/2013/), 2013.
- Merzlyakov, E., G., Jacobi, C., Portnyagin, Yu., I., and Solovjova, T., V.: Structural changes in trend parameters of the MLT winds based on wind measurements at Obninsk (55°N, 37°E) and Collm (52°N, 15°E), *Journal of atmospheric and solar-terrestrial physics*, 71, 1547–1557, <https://doi.org/doi:10.1016/j.jastp.2009.05.013>, 2009.
- 10 Munk, W. H. and MacDonald, G. J. F.: *The Rotation of the Earth. A Geophysical Discussion*, vol. 98, Cambridge University Press, <https://doi.org/10.1017/S0016756800060726>, 1961.
- Rosen, R. D. and Salstein, D.: Comment on "A Seasonal budget of the Earth's axial angular momentum" by Naito and Kikuchi., *Geophys. Res. Lett.*, 18, <https://doi.org/10.1029/91GL02312>, issn: 0094-8276., 1991.
- Rothacher, M.: *Proceedings of the IERS Workshop on Combination Research and Global Geophysical Fluids*, Bavarian Academy of Sciences, Munich, Germany, chap. Towards a Rigorous Combination of Space Geodetic Techniques., pp. 18–21, International Earth Rotation and Reference Systems Service (IERS). IERS Technical Note , No. 30, Verlag des Bundesamtes für Kartographie und Geodäsie, <https://doi.org/ISBN-3-89888-877-0>, 2002.
- 15 She, C., Krueger, D., A., and Yuan, T.: Long-term midlatitude mesopause region temperature trend deduced from quarter century (1990–2014) NA lidar observations, *Annales Geophysicae*, 33, 363–369, <https://doi.org/doi:10.5194/angeocom-33-363-2015>, 2015.
- 20 Stober, G., Jacobi, C., Matthias, V., Hoffmann, P., and Gerding, M.: Neutral air density variations during strong planetary wave activity in the mesopause region derived from meteor radar observations, *Journal of Atmospheric and Solar-Terrestrial Physics*, 74, 55–63, <https://doi.org/10.1016/j.jastp.2011.10.007>, 2012.
- Stober, G., Matthias, V., Brown, P., and Chau, J. L.: Neutral density variation from specular meteor echo observations spanning one solar cycle, *Geophysical Research Letters*, 41, 6919–6925, <https://doi.org/10.1002/2014GL061273>, 2014.
- 25 Stober, G., Matthias, V., Jacobi, C., Wilhelm, S., J., H., and Chau, J. L.: Exceptionally strong summer-like zonal wind reversal in the upper mesosphere during winter 2015/16, *Annales Geophysicae*, 35, 711–720, <https://doi.org/10.5194/angeo-35-711-2017>, 2017.
- Tomé, A., R. and Miranda, P., M. A.: Piecewise linear fitting and trend changing points of climate parameters, *Geophys. Res. Lett.*, 31, <https://doi.org/doi:10.1029/2003GL019100>, 2004.
- Trenberth, K., E. and Guillemot, C., J.: The total mass of the atmosphere, *Journal of Geophysical Research: Atmospheres*, 99, 23 079–23 088, <https://doi.org/10.1029/94JD02043>, <http://dx.doi.org/10.1029/94JD02043>, 1994.
- 30 Trenberth, K., E. and Smith, L.: The Mass of the Atmosphere: A Constraint on Global Analyses, *Journal of Climate*, 18, <https://doi.org/10.1175/JCLI-3299.1>, 2004.
- Volland, H.: Atmospheric effects on the Earth's rotation, *Proceedings of a Workshop held at the Center for Interdisciplinary Research (ZiF)*, in: *Earth's Rotation from Eons to Days*, edited by Brosche, P. and Suendermann, J., pp. 127–140, Springer-Verlag, 1988.
- 35 Vondrák, J. and Burša, M.: The rotation of the earth between 1955.5 and 1976.5, *Studia Geophysica et Geodaetica*, 21, 107–117, <https://doi.org/10.1007/BF01634821>, <https://doi.org/10.1007/BF01634821>, 1977.
- Walterscheid, R., L.: Solar Cycle effects on the upper atmosphere: Implications for Satellite Drag, *Journal of spacecraft and rockets*, 26, 439–444, <https://doi.org/DOI:10.2514/3.26089>, 1989.



Waters, J. W., Froidevaux, L., Harwood, R. S., Jarnot, R. F., Pickett, H. M., Read, W. G., Siegel, P. H., Cofield, R. E., Filipiak, M. J., Flower, D. A., Holden, J. R., Lau, G. K., Livesey, N. J., Manney, G. L., Pumphrey, H. C., Santee, M. L., Wu, D. L., Cuddy, D. T., Lay, R. R., Loo, M. S., Perun, V. S., Schwartz, M. J., Stek, P. C., Thurstans, R. P., Boyles, M. A., Chandra, K. M., Chavez, M. C., Chen, G.-S., Chudasama, B. V., Dodge, R., Fuller, R. A., Girard, M. A., Jiang, J. H., Jiang, Y., Knosp, B. W., LaBelle, R. C., Lam, J. C., Lee, K. A., Miller, D., Oswald, J. E., Patel, N. C., Pukala, D. M., Quintero, O., Scaff, D. M., Snyder, W. V., Tope, M. C., Wagner, P. A., and Walch, M. J.: The Earth observing system microwave limb sounder (EOS MLS) on the aura Satellite, IEEE Transactions on Geoscience and Remote Sensing, 44, 1075–1092, <https://doi.org/10.1109/TGRS.2006.873771>, 2006.

5

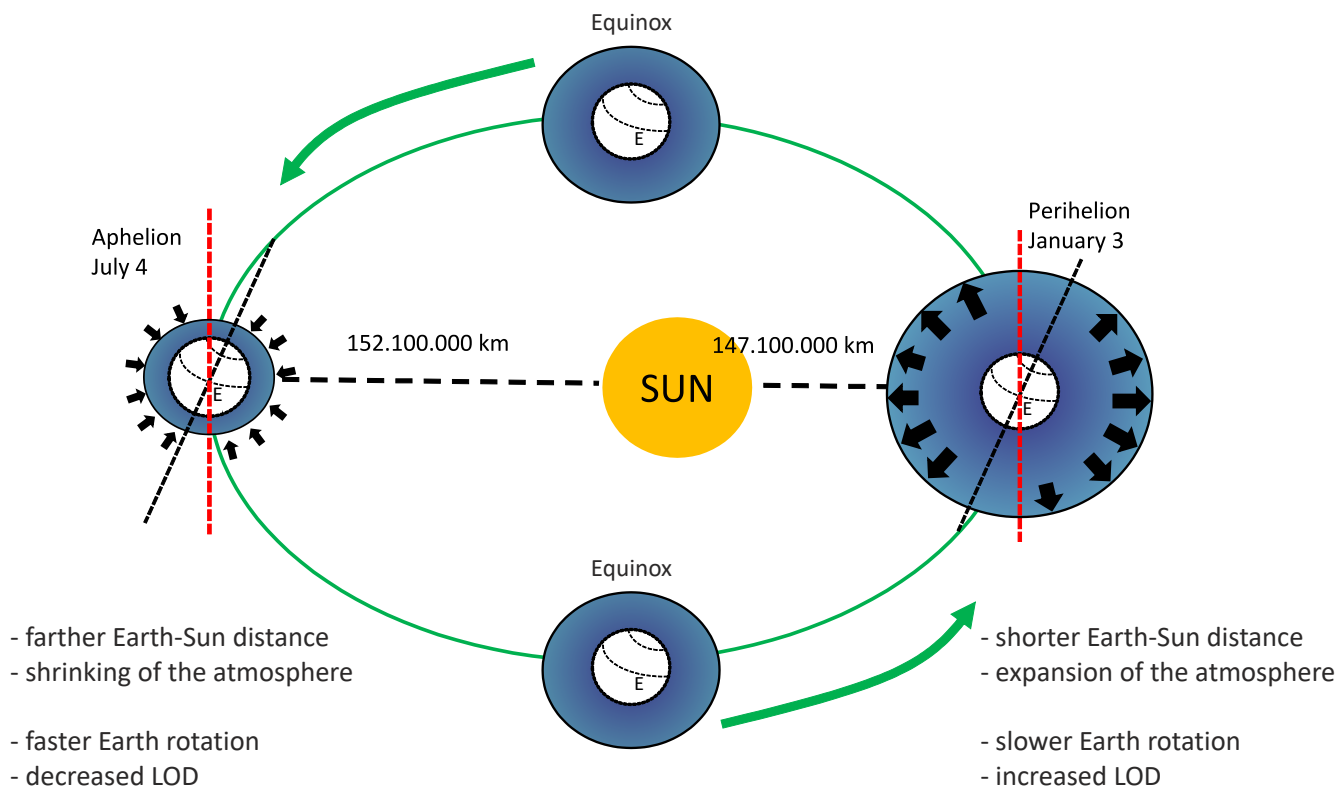

**Figure 1.** Schema of Earth and Sun correlation and the resulting effects on the thickness of the atmosphere and the Earth's rotation velocity.

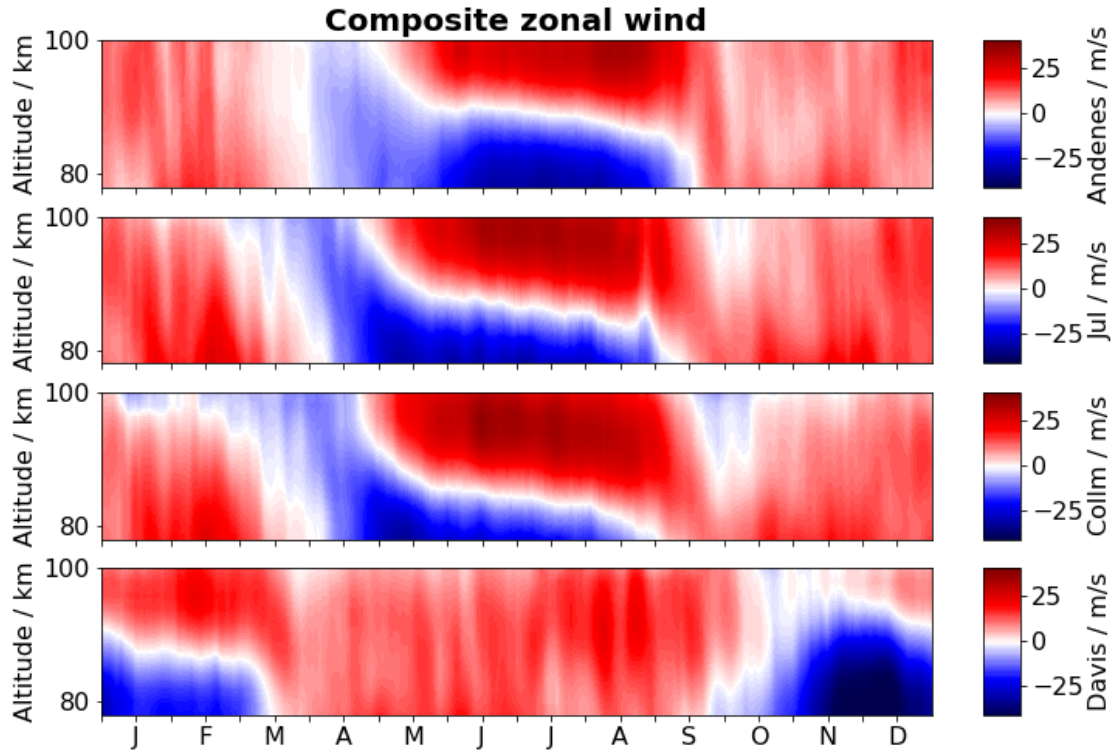

**Figure 2.** Composites of zonal wind for the northern hemisphere stations Andenes (top), Juliusruh (2nd row), and Collm (3th row). At the bottom is shown the southern hemispheric station of Davis. The composite for Andenes, Collm, and Davis include 12 years of meteor radar data and that of Juliusruh 9 years. Positive values correspond to eastward directed winds and negative to westward directed winds.

| km        | 80    | 82    | 84    | 86    | 88    | 90    | 92    | 94    | 96    | 98    |
|-----------|-------|-------|-------|-------|-------|-------|-------|-------|-------|-------|
| Andenes   | 0.57  | 0.56  | 0.52  | 0.42  | 0.21  | -0.13 | -0.45 | -0.61 | -0.67 | -0.69 |
| Juliusruh | 0.43  | 0.36  | 0.23  | 0.04  | -0.23 | -0.48 | -0.62 | -0.67 | -0.68 | -0.68 |
| Collm     | 0.3   | 0.19  | -0.01 | -0.3  | -0.54 | -0.65 | -0.68 | -0.68 | -0.66 | -0.64 |
| Davis     | -0.37 | -0.37 | -0.38 | -0.39 | -0.41 | -0.42 | -0.41 | -0.38 | -0.35 | -0.32 |

**Table 1.** Correlation coefficients between the zonal wind and the LOD. Positive values corresponds to the occurrence of e.g., an eastward directed zonal mean wind together with a positive fluctuation in the LOD.

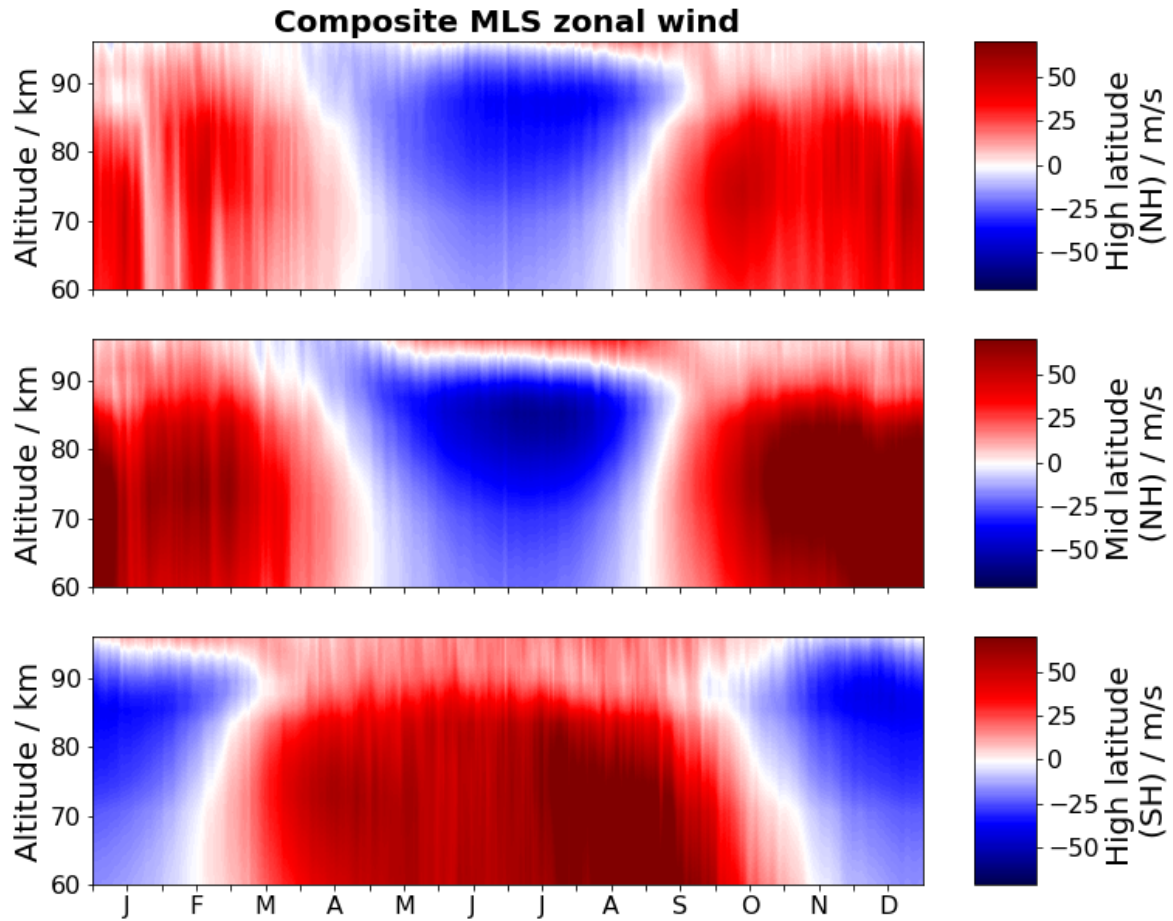

**Figure 3.** Composite of zonal wind for high latitude location (top), and mid latitude location (bottom). The composite of both figures includes 12 years of data wind data derived from MLS geopotential height data. Positive values corresponds to eastward directed winds and negative to westward directed winds. The altitude is given in geopotential height.

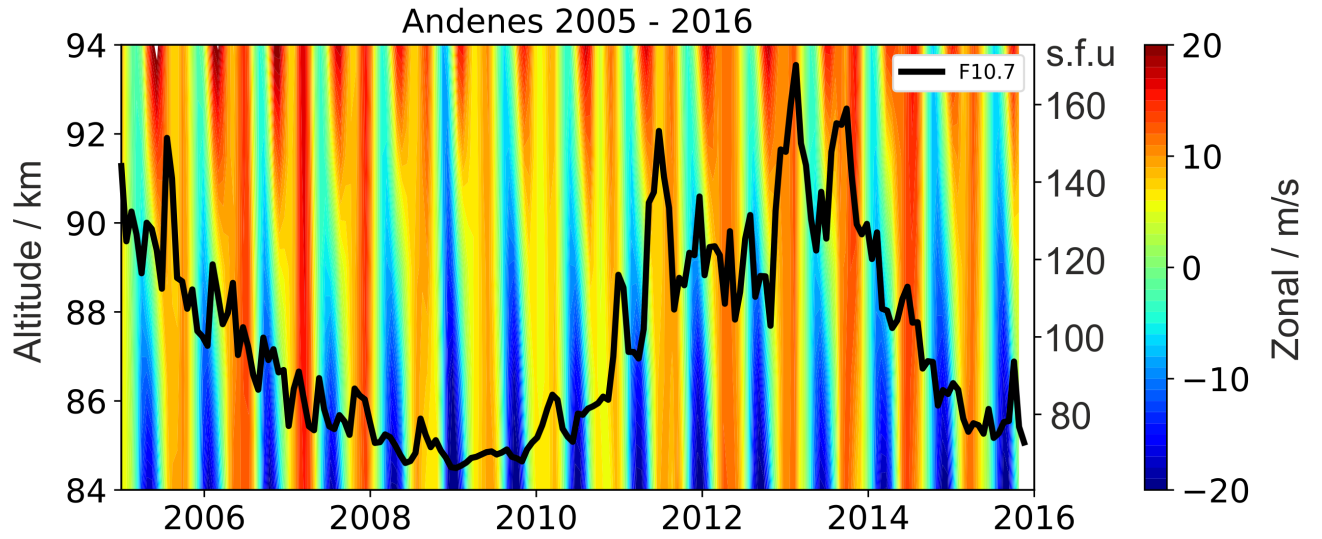

**Figure 4.** Zonal mean wind for Andenes for the heights between 84 and 94 km, together with the F10.7 solar radio index in solar flux units in black.

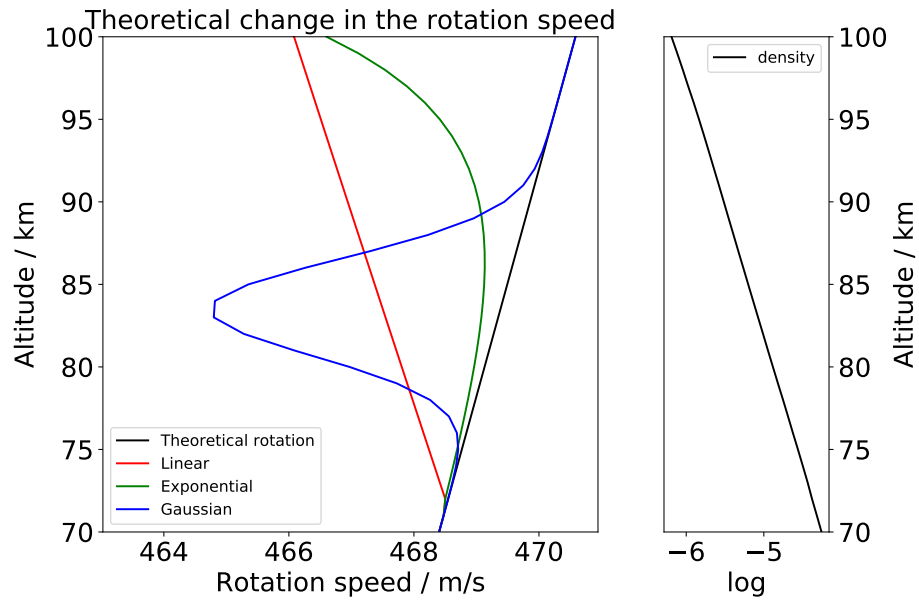

**Figure 5.** Theoretical change of the rotation speed (left side) for a rigid atmospheric layer. In black the theoretical rotation speed of the Earth's atmosphere and in colors the change due to density increase of 1% according the legend. On the right side the density progress is shown for specific altitudes.

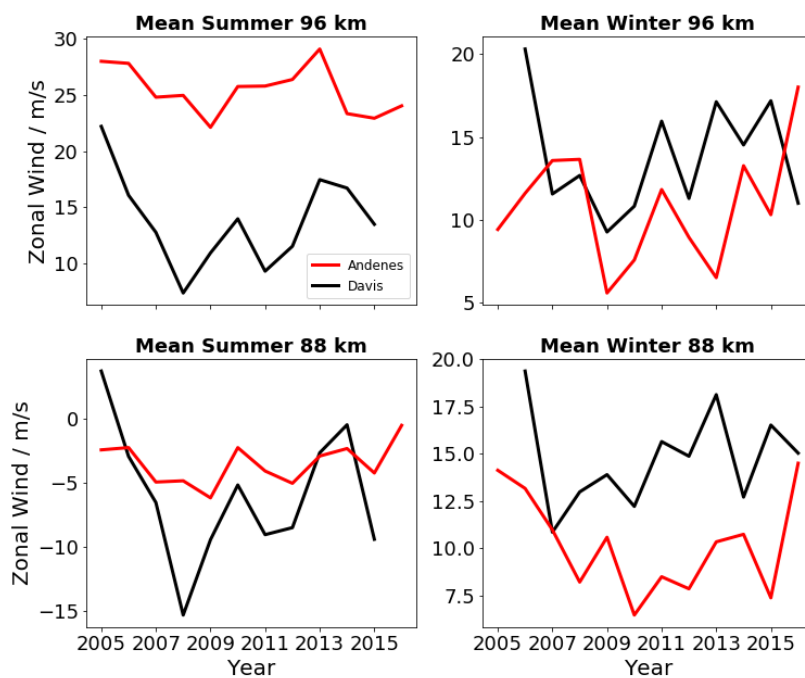

**Figure 6.** Zonal wind amplitudes for winter and summer season at 96 km and 88 km for Andenes and Davis.

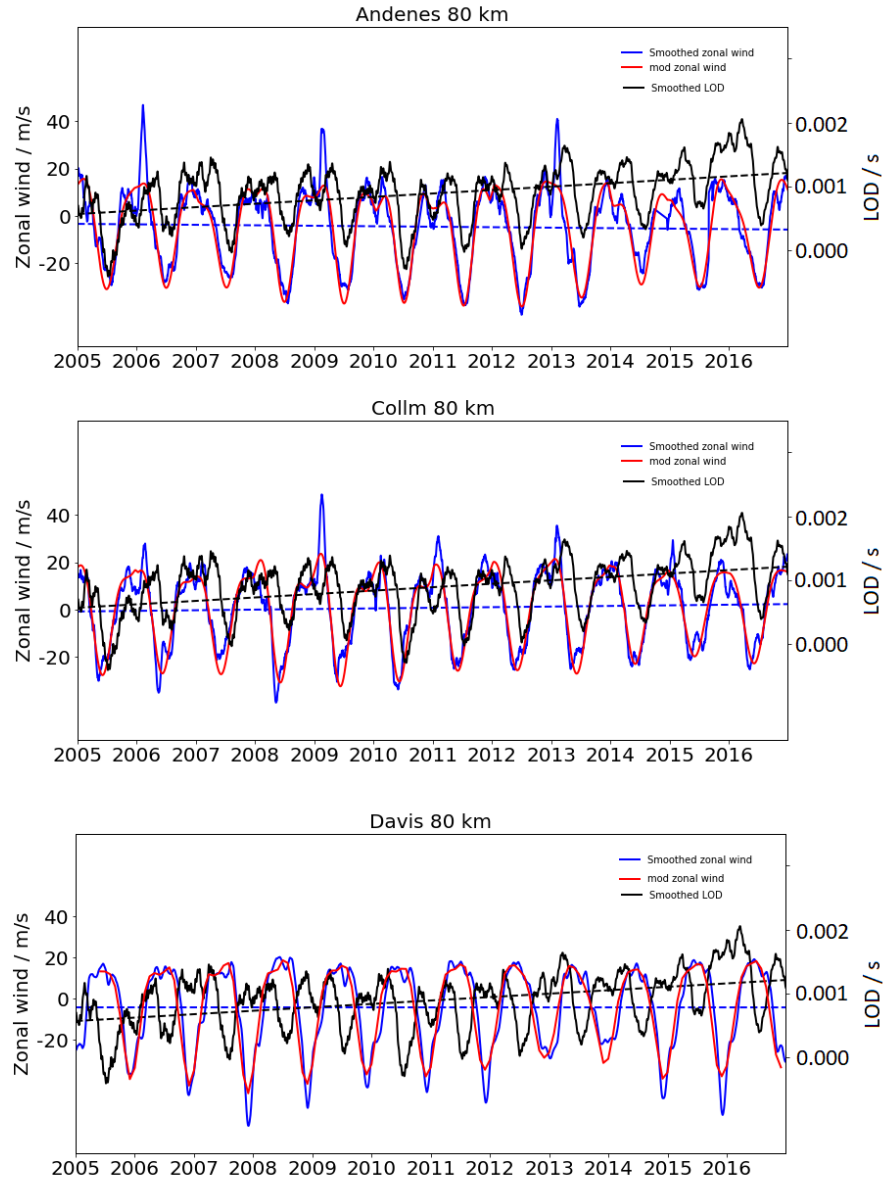

**Figure 7.** Smoothed zonal wind (blue) values based on meteor radar wind data at 80 km and smoothed LOD (black) values. The modulation of the smoothed zonal wind is displayed in red after removing the impact of the solar cycle, whereby the smoothing is stronger as in blue. All curves are done by a smooth over several days, without removing the day-to-day variations, to show the seasonal pattern of the parameters. The dashed lines corresponds to the tendency of the wind/LOD based on linear regression.

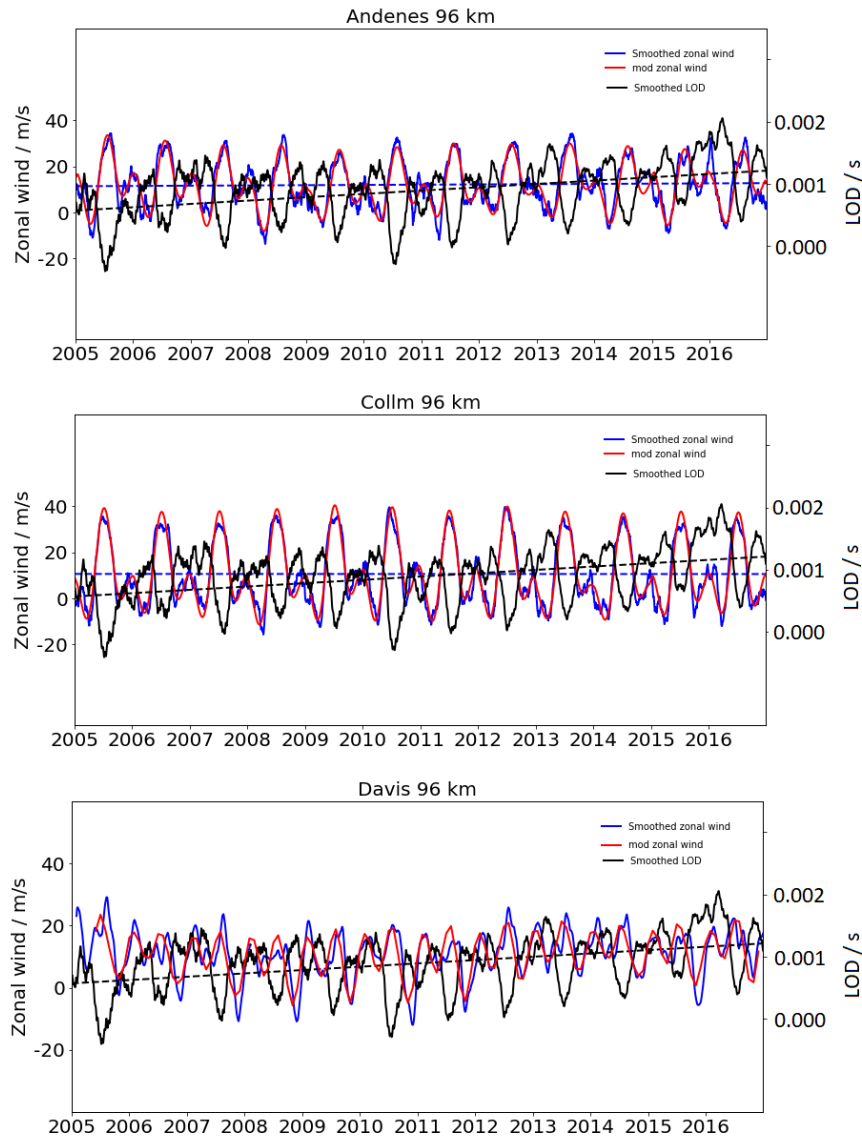

**Figure 8.** Same as Figure 7, but for 96 km.

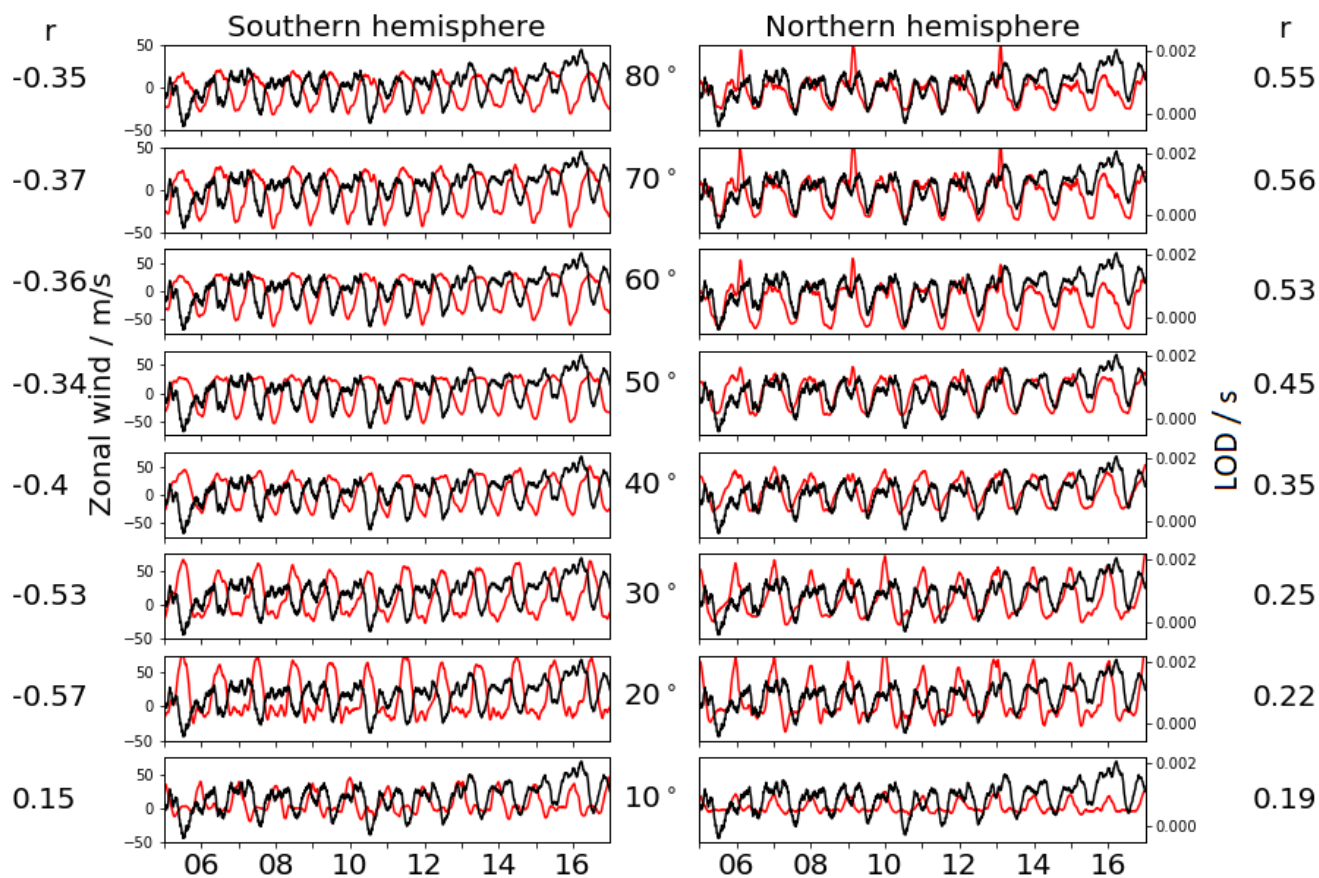

**Figure 9.** Zonal MLS wind (red) and LOD (black) at  $\sim 80$  km geometric height for  $0^\circ$ - $20^\circ$ E. The left part show the values for the southern hemisphere, the right for the northern hemisphere, for every  $10^\circ$  latitude.



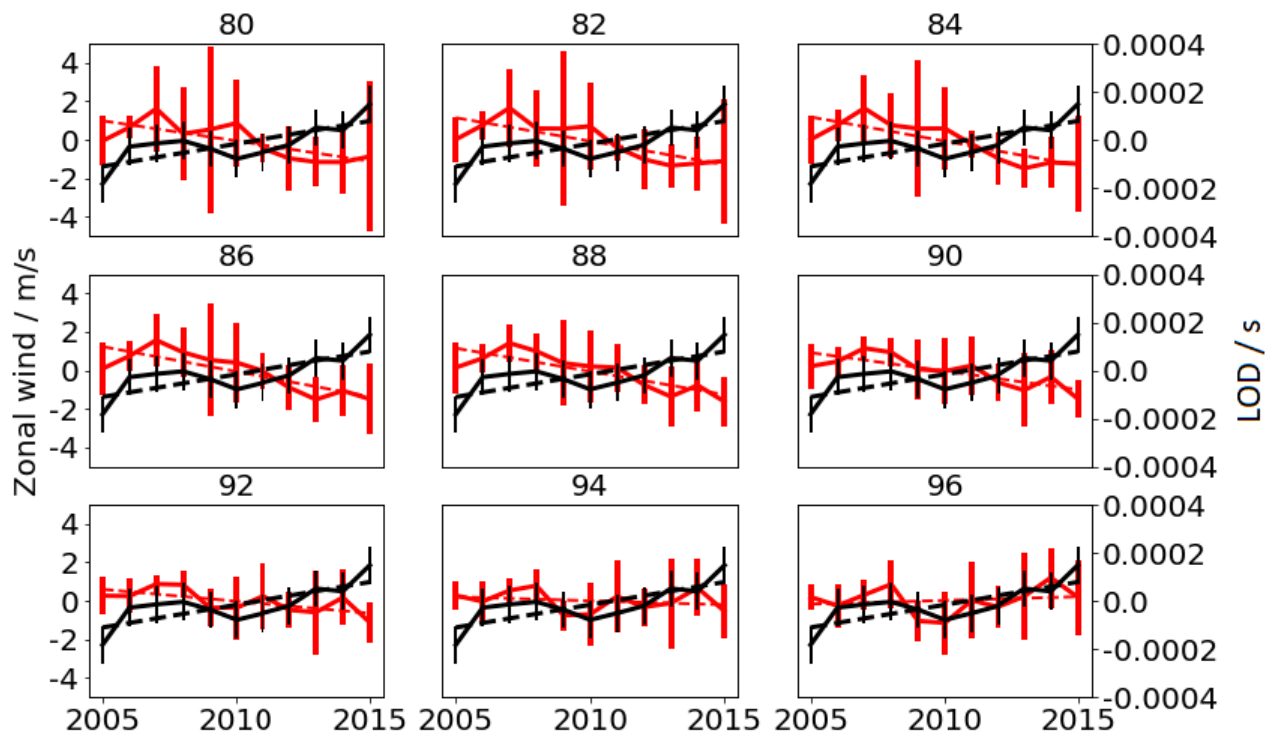

**Figure 10.** Annual mean values for the LOD (black) and the zonal wind (red), for the station Collm, after removing seasonal variations and the solar cycle for the altitudes between 80 and 100 km. The errorbars corresponds to the standard deviation. The dashed lines represents the tendency.

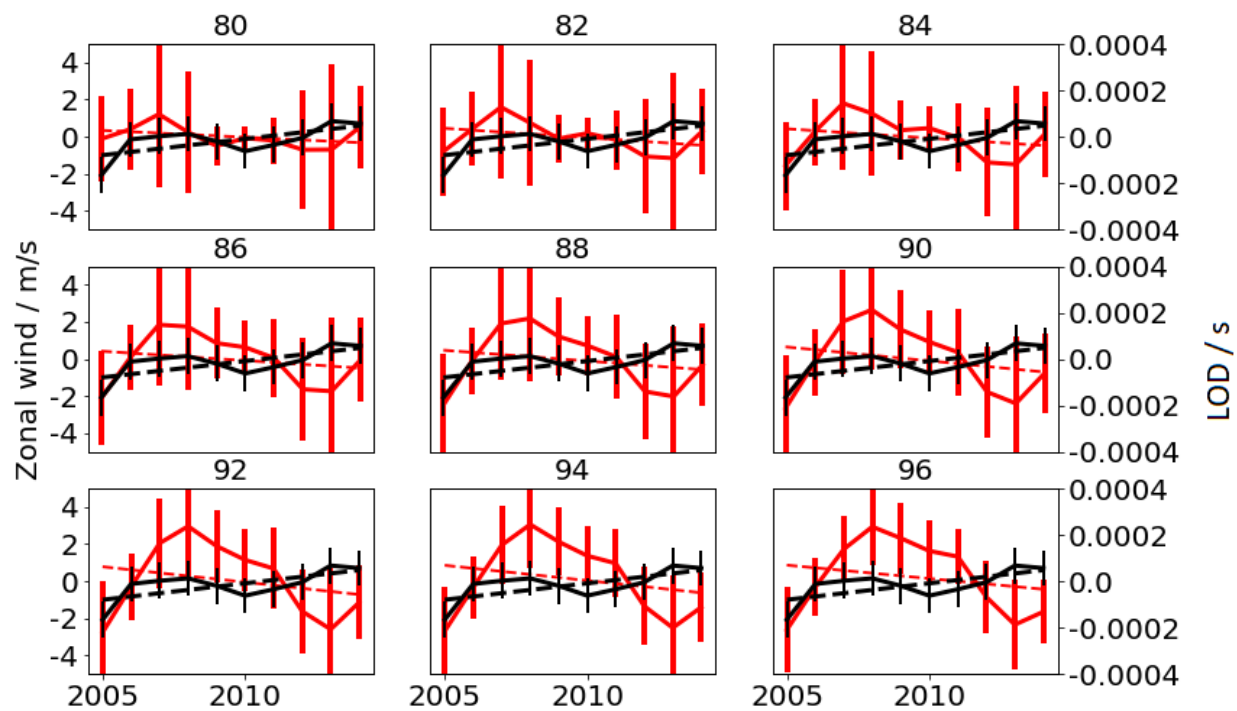

**Figure 11.** Same as Figure 10, but for Davis.
